# Supplementary material
Source: Royal Society of Chemistry journal article supplement (doi:10.1039/d5rp00456j)
Supplement: d5rp00456j1.pdf [file d5rp00456j1.pdf]

## Appendix B

### Visual Representations of Resource Activation

The following figures present visual representations of resource activation for each participant. The representations are informed by Wittmann's (2006) resource graphs. Each figure depicts the resources a participant activated in the service of answering the interview question. Specifically, each graph identifies the readouts (the features of the titration curve that initiated reasoning, also known as extractions), the knowledge elements activated in response to that readouts, and the conclusion the participant reached. Figures are organized by participant and correspond to the case descriptions in the Results section.

## Participant P1

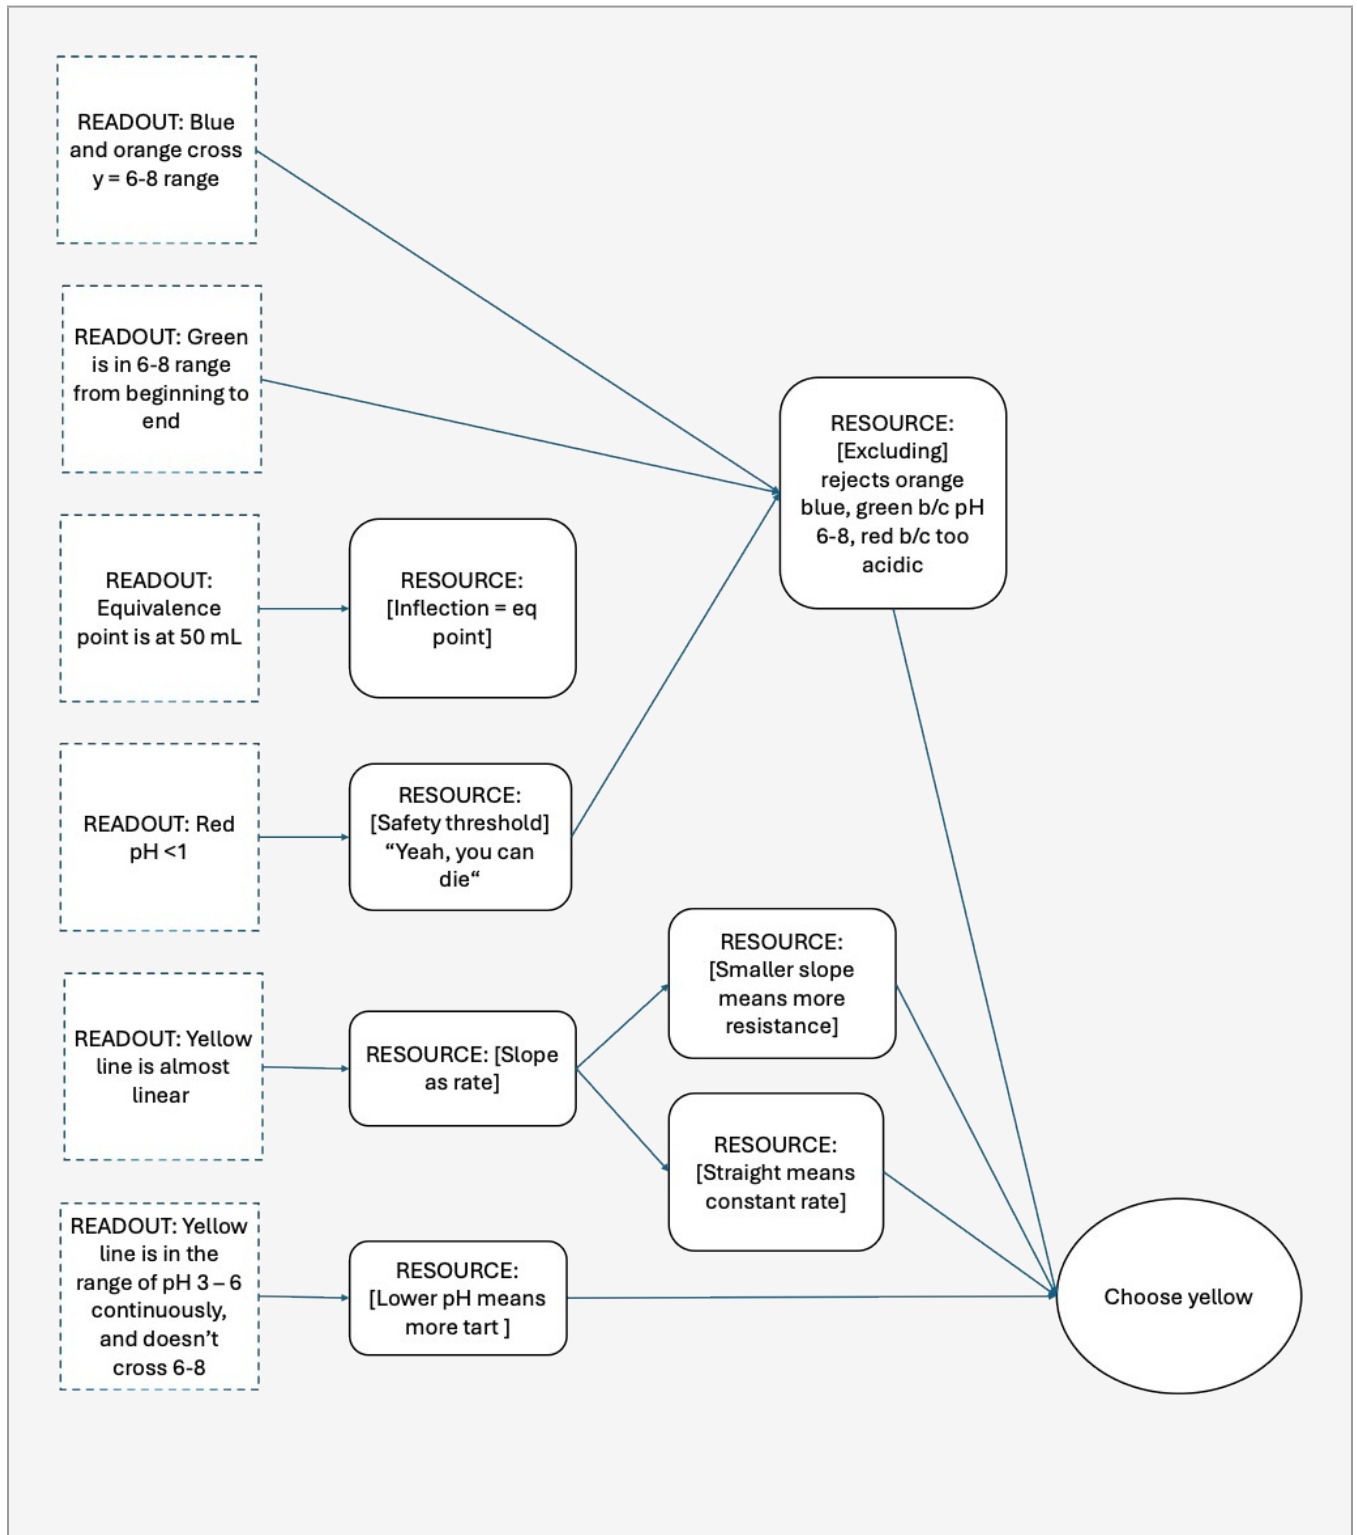

**Figure B1.** Visual representation of resource activation in the service of answering the interview question for P1, showing the readouts, activated knowledge elements, and conclusion.

**Participant P2**

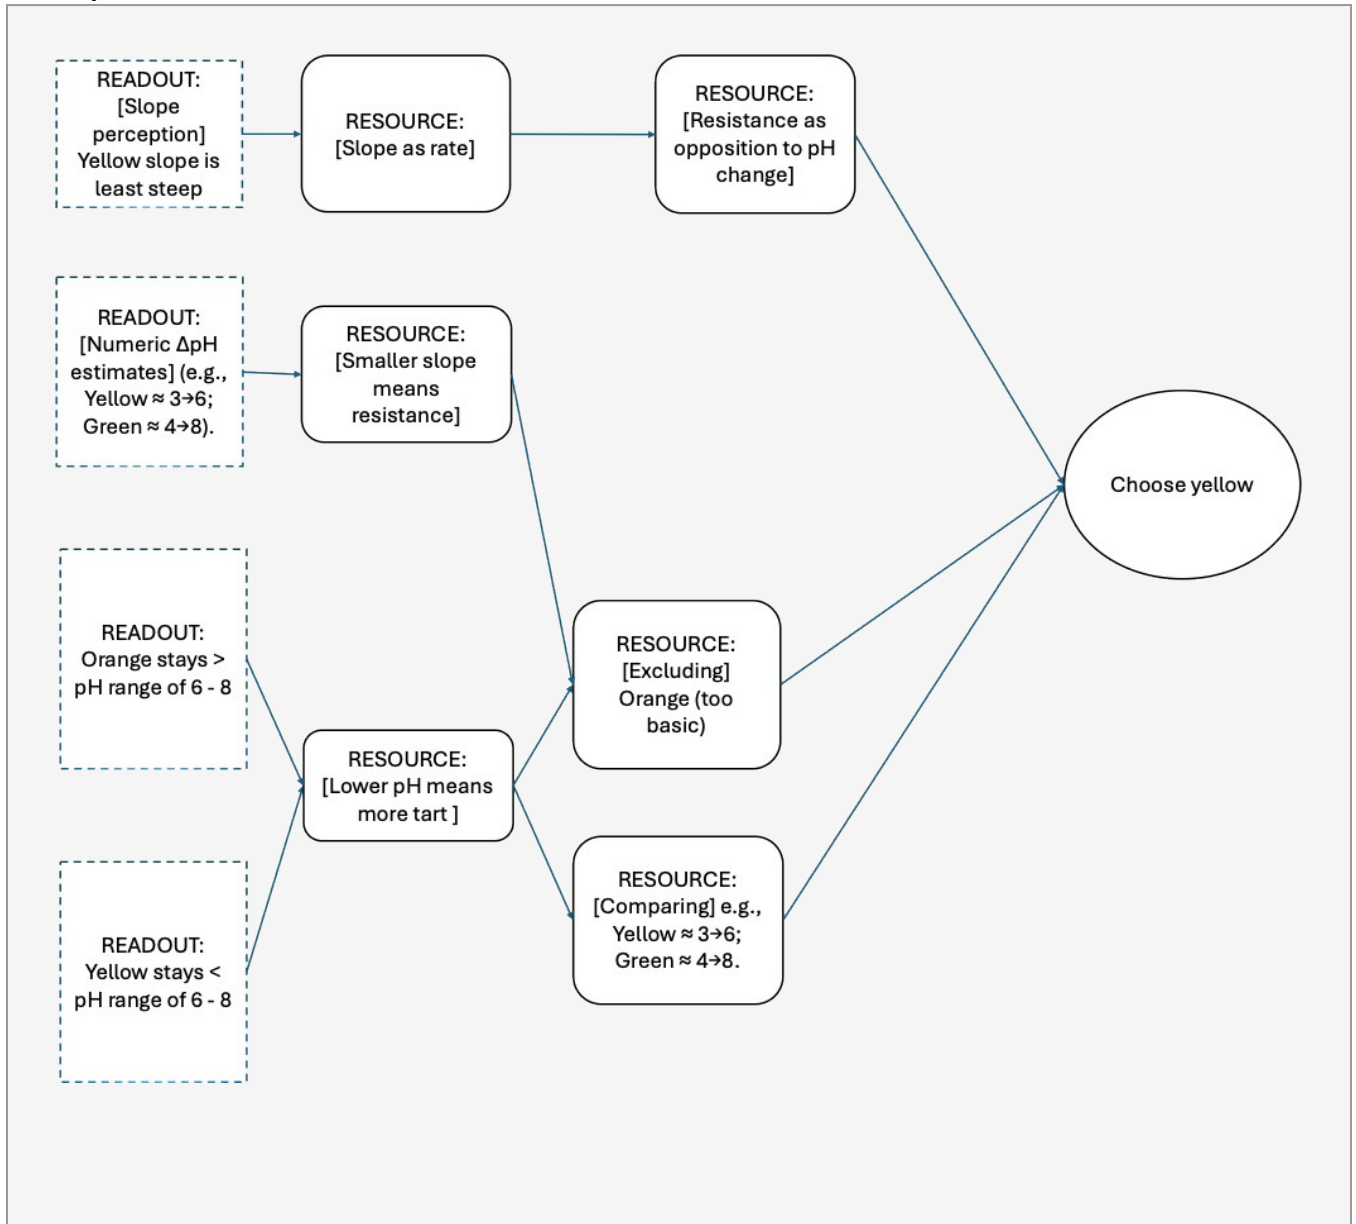

**Figure B2.** Visual representation of resource activation in the service of answering the interview question for P2, showing the readouts, activated knowledge elements, and conclusion.

## Participant P3

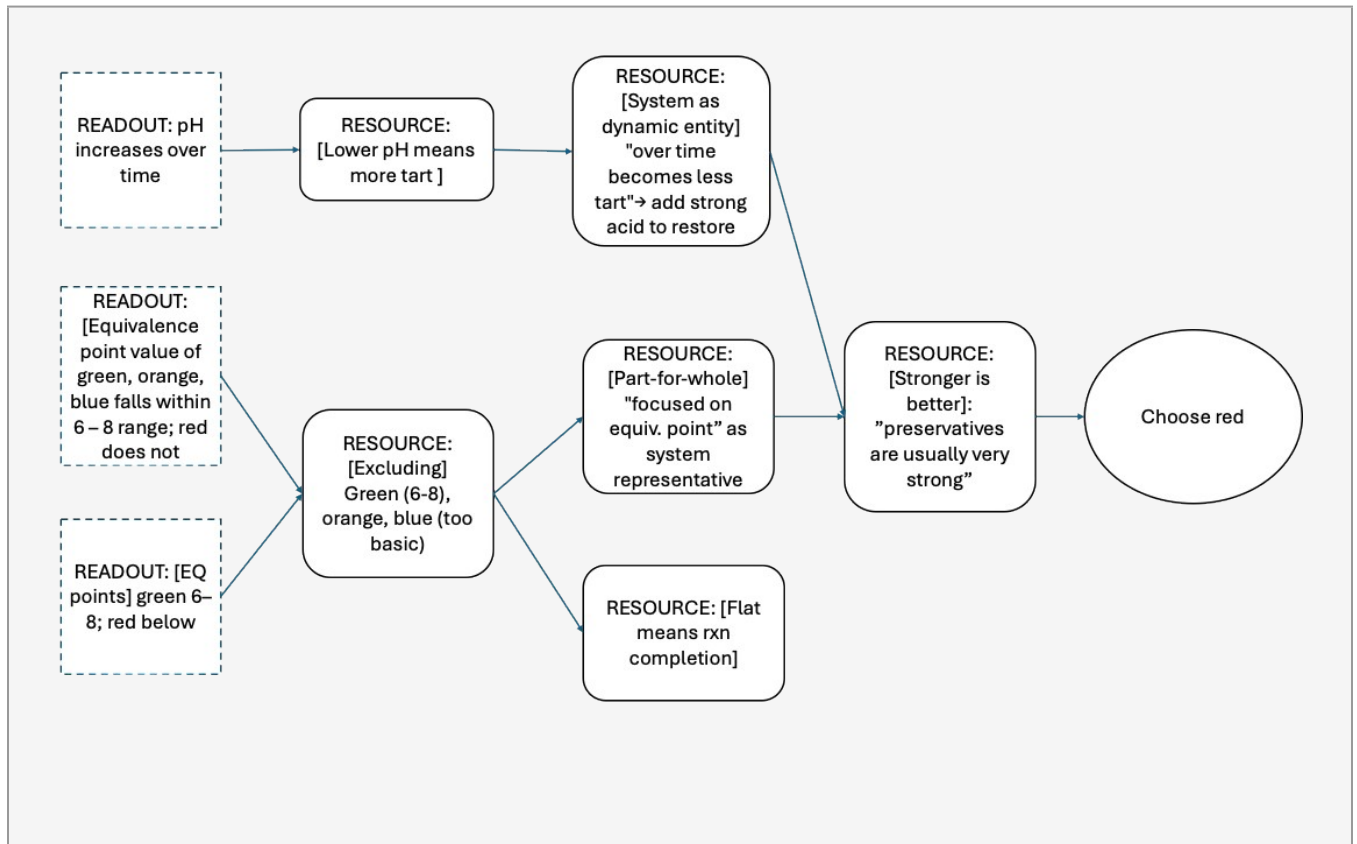

**Figure B3.** Visual representation of resource activation in the service of answering the interview question for P3, showing the readouts, activated knowledge elements, and conclusion.

## Participant P4

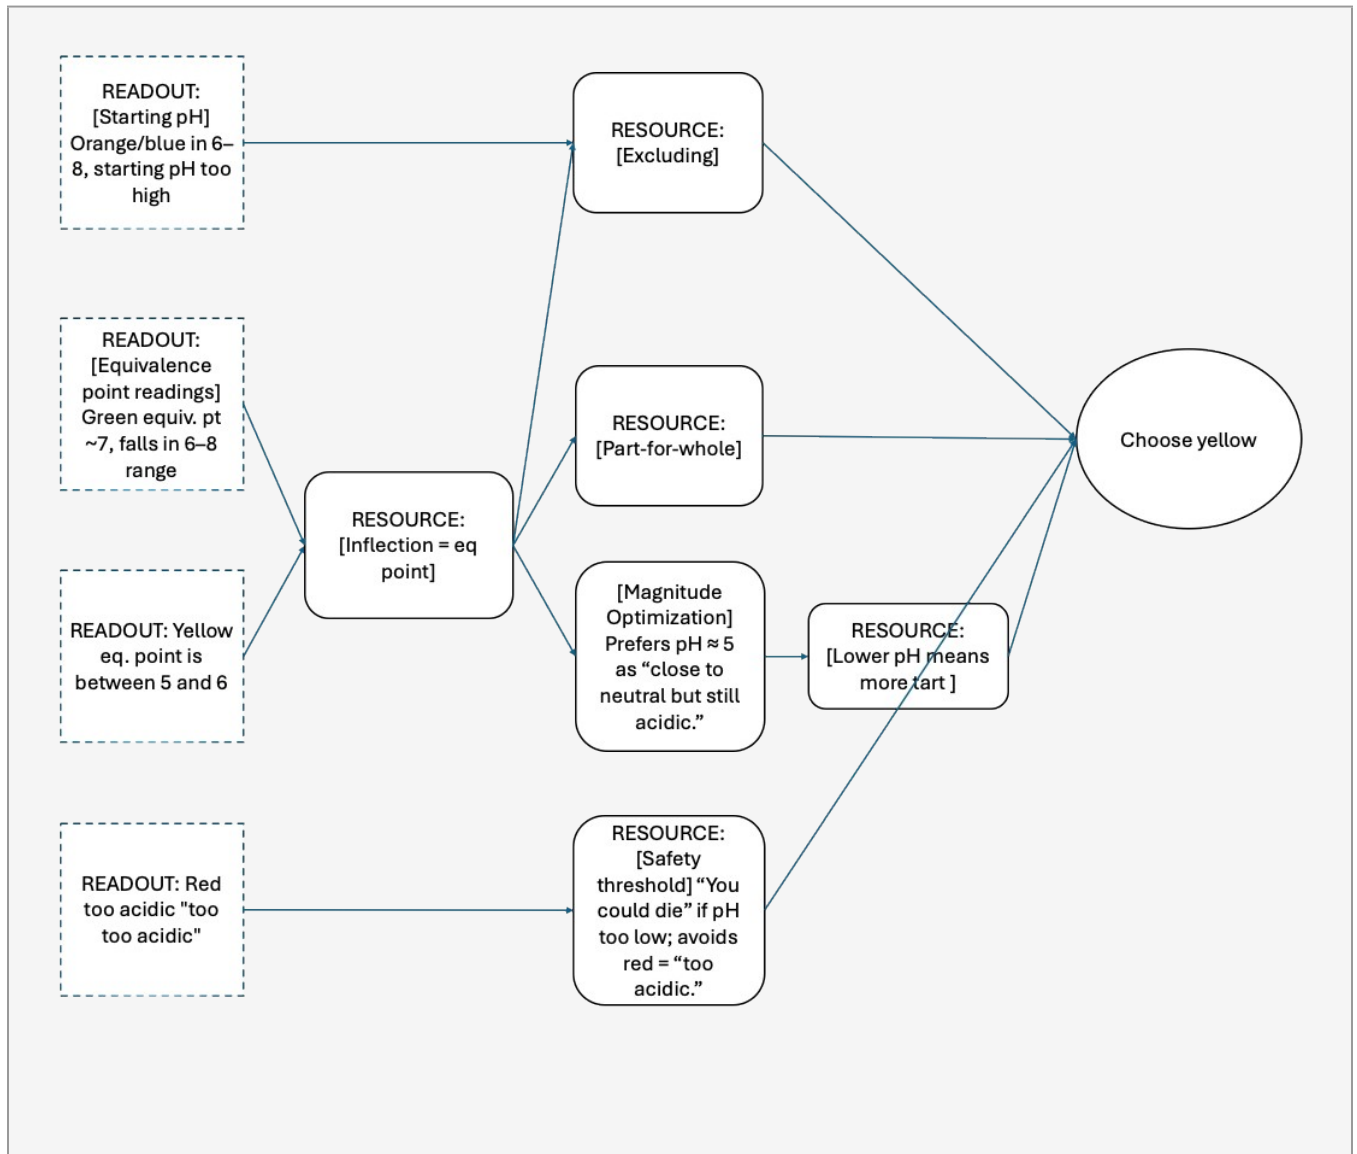

**Figure B4.** Visual representation of resource activation in the service of answering the interview question for P4, showing the readouts, activated knowledge elements, and conclusion.

## Participant P5

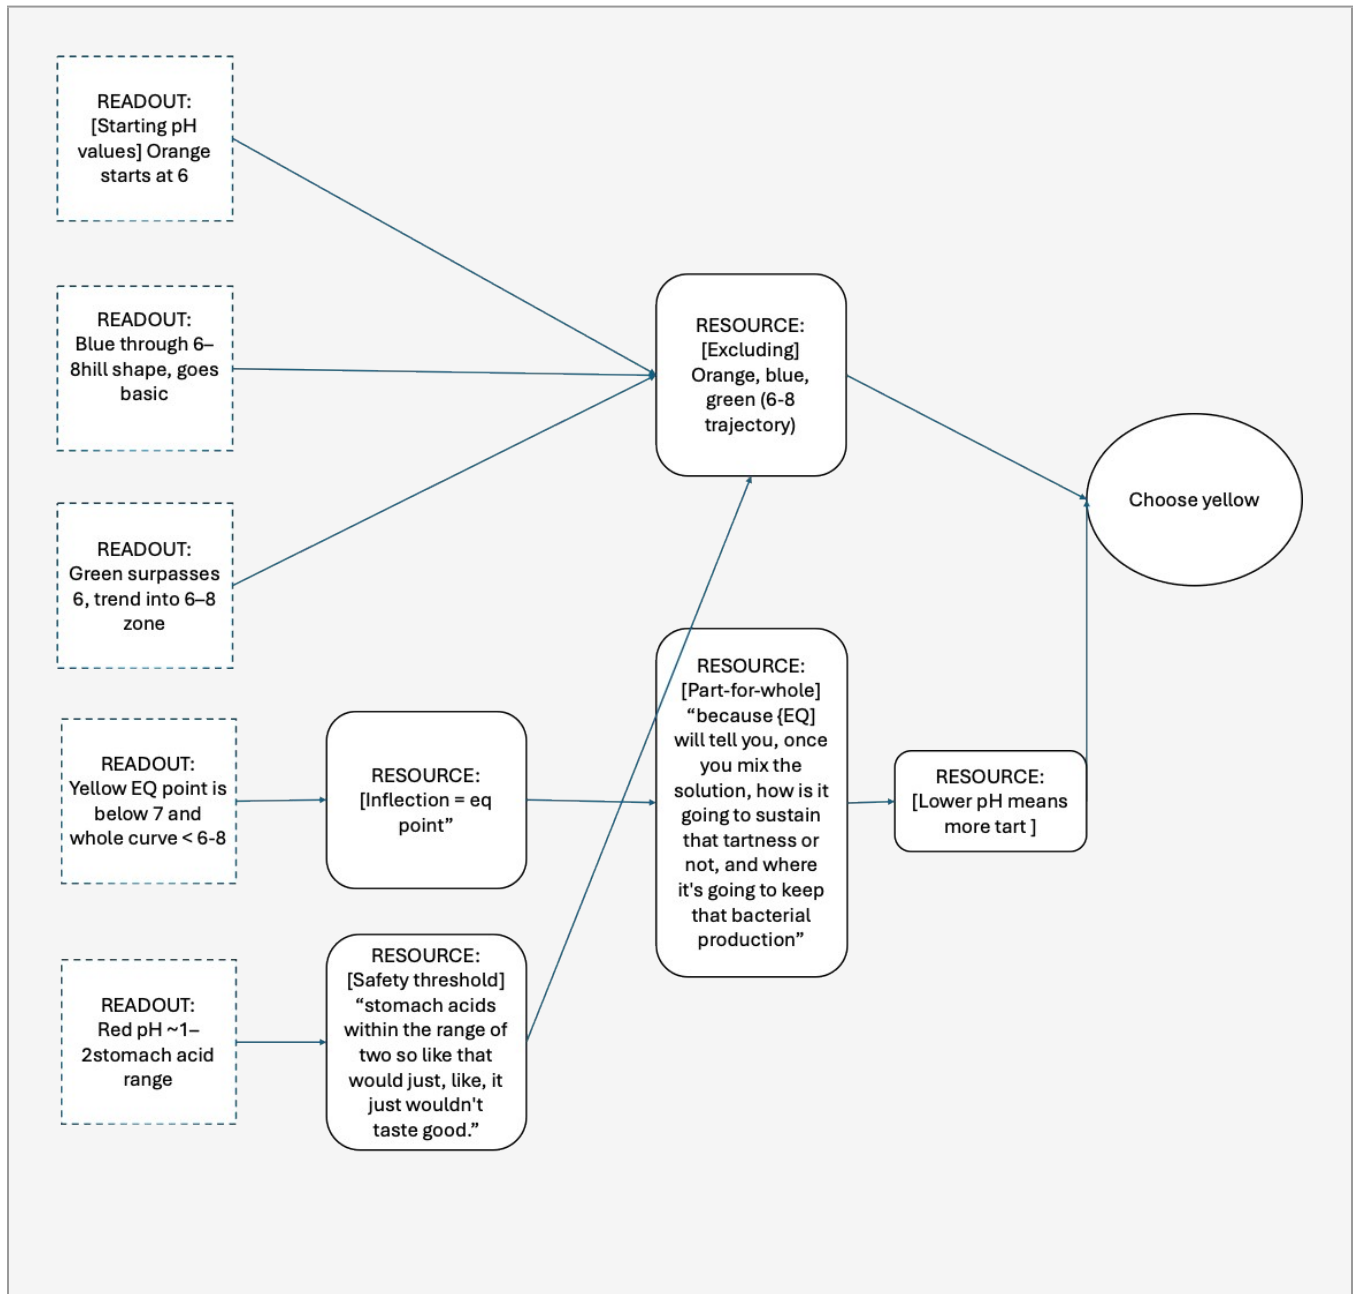

**Figure B5.** Visual representation of resource activation in the service of answering the interview question for P5, showing the readouts, activated knowledge elements, and conclusion.

## Participant P6

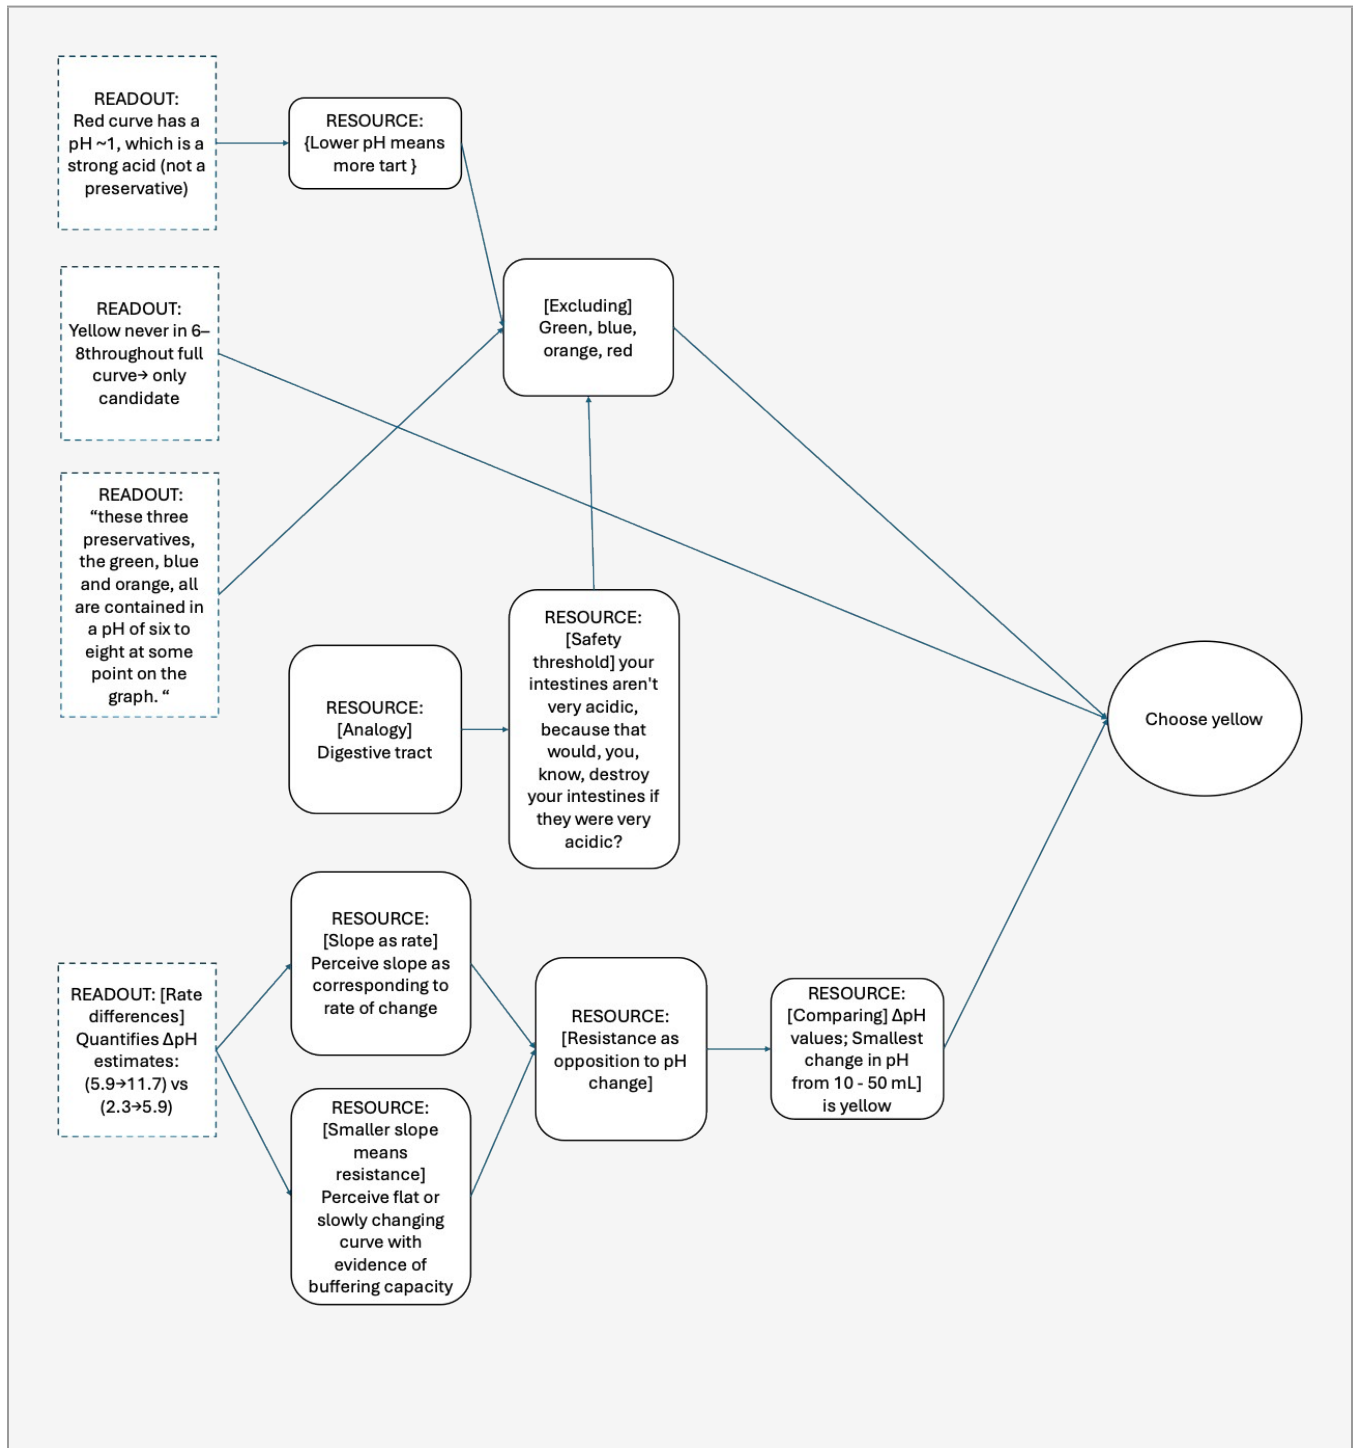

**Figure B6.** Visual representation of resource activation in the service of answering the interview question for P6, showing the readouts, activated knowledge elements, and conclusion.

## Participant P7

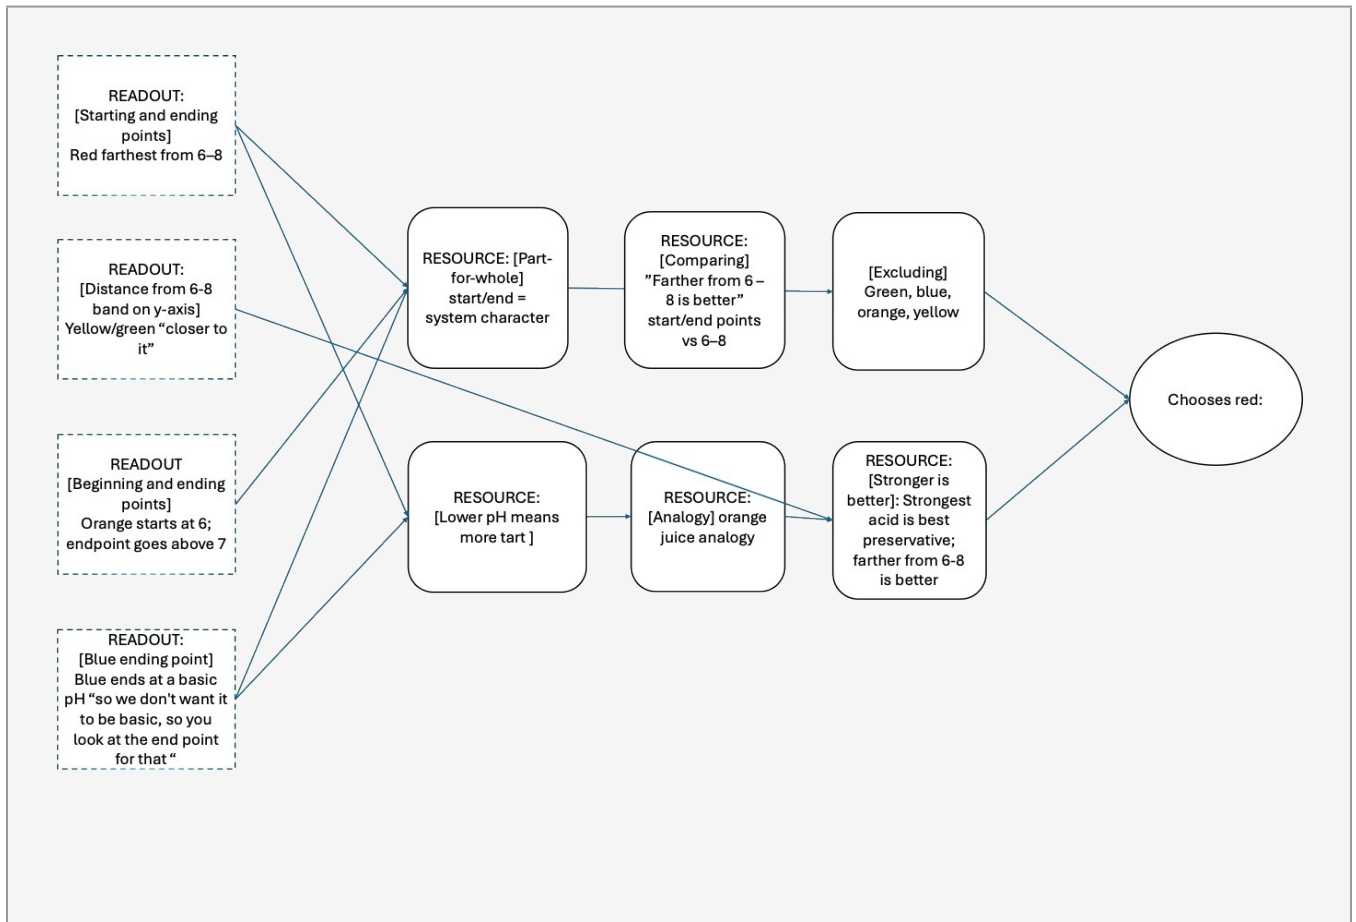

**Figure B7.** Visual representation of resource activation in the service of answering the interview question for P7, showing the readouts, activated knowledge elements, and conclusion.

## Participant P8

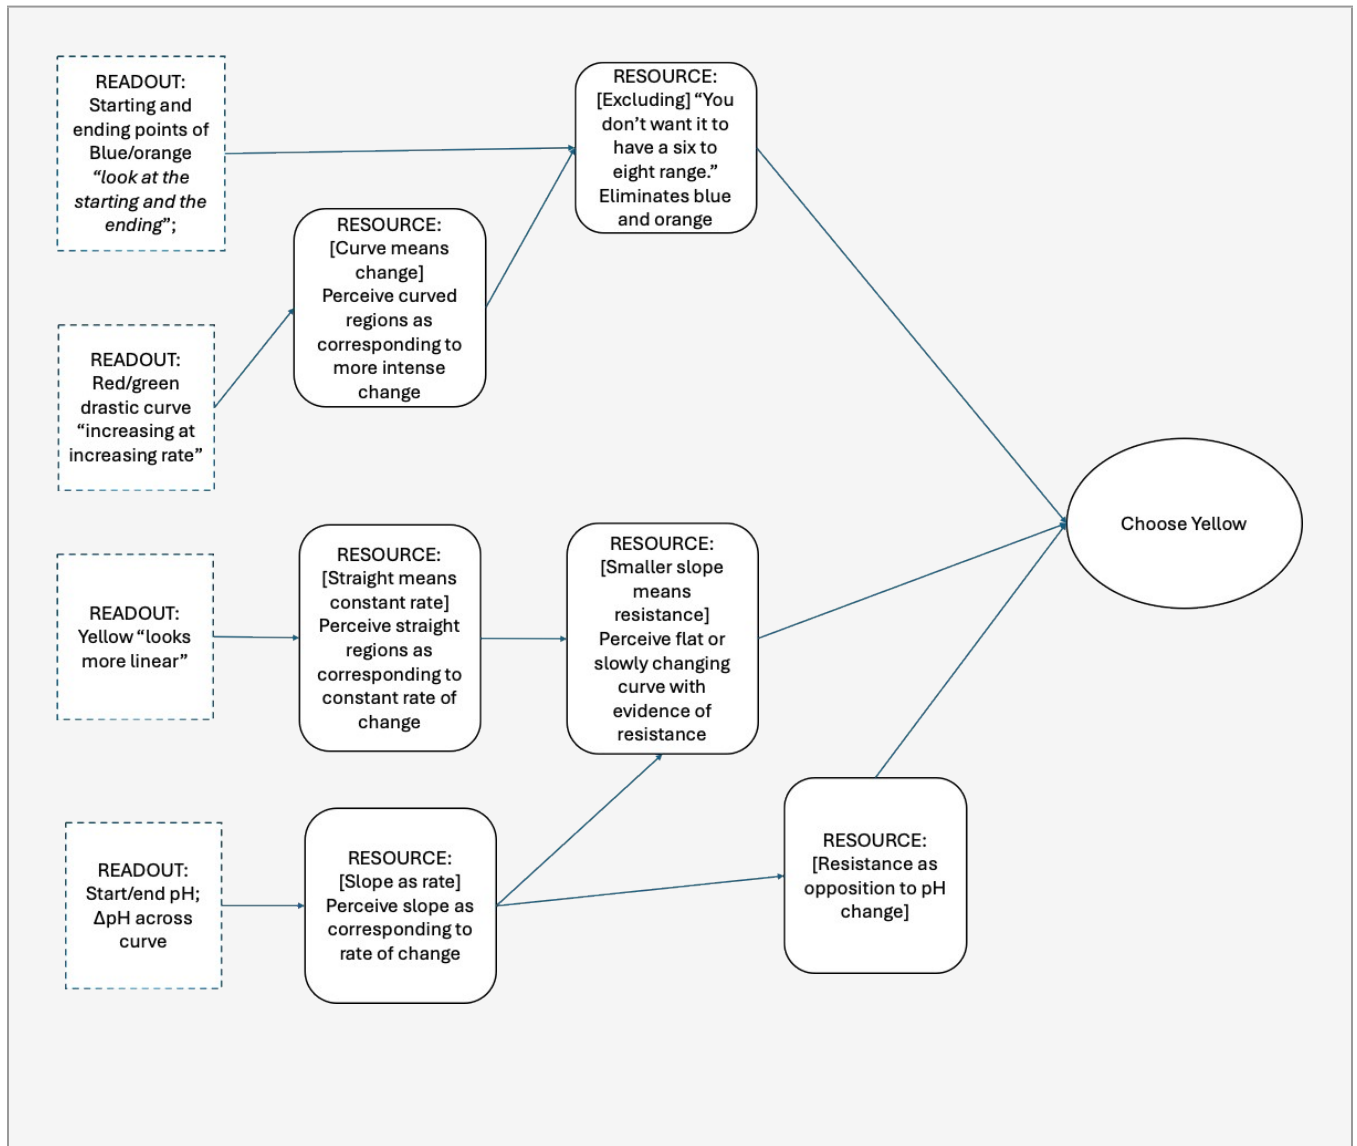

**Figure B8.** Visual representation of resource activation in the service of answering the interview question for P8, showing the readouts, activated knowledge elements, and conclusion.

## Participant P9

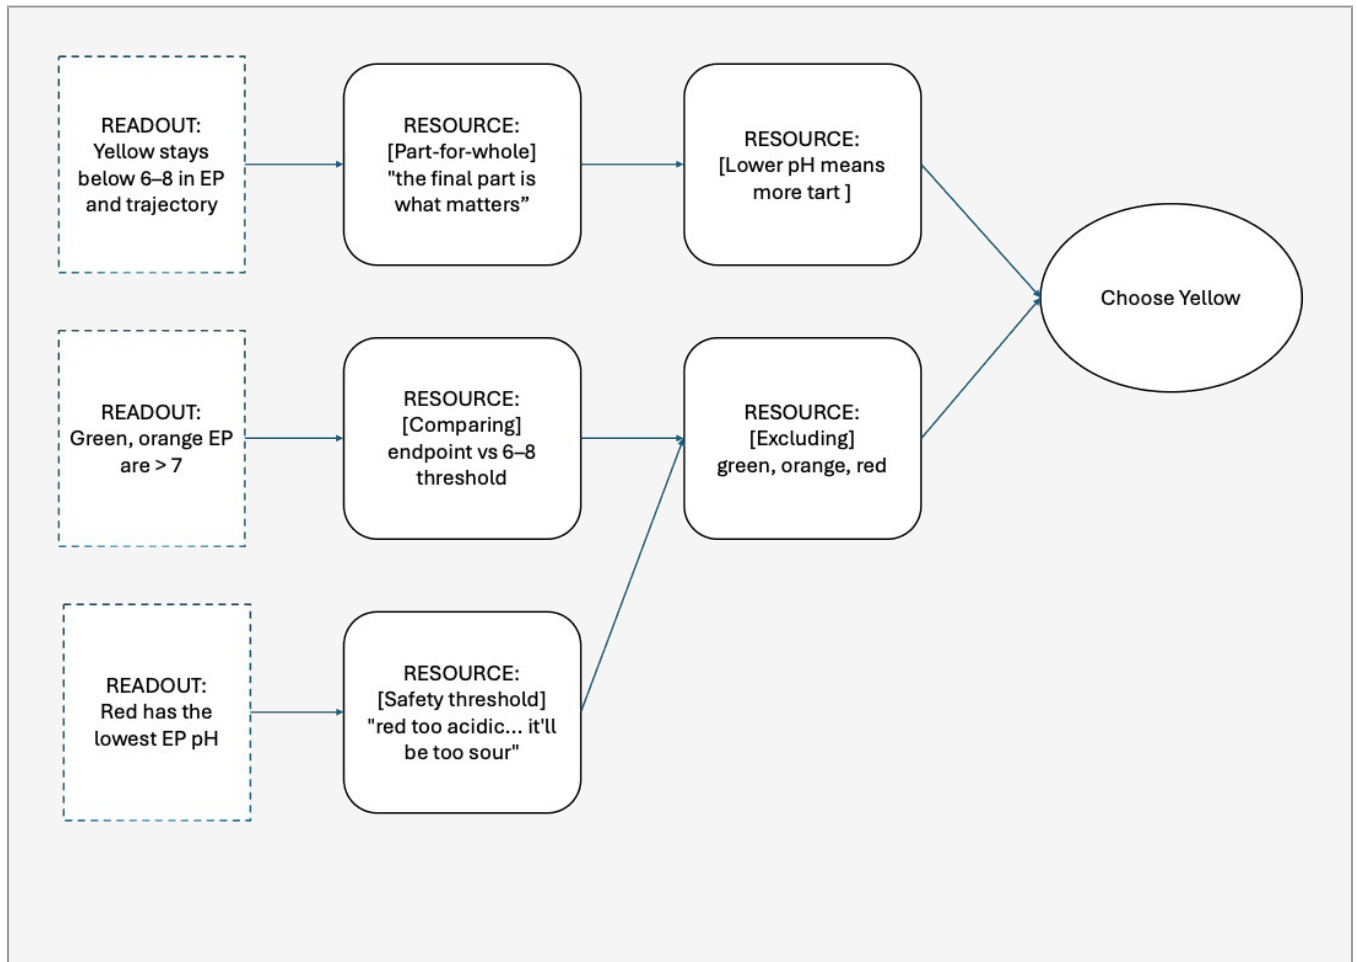

**Figure B9.** Visual representation of resource activation in the service of answering the interview question for P9, showing the readouts, activated knowledge elements, and conclusion.

## Participant P10

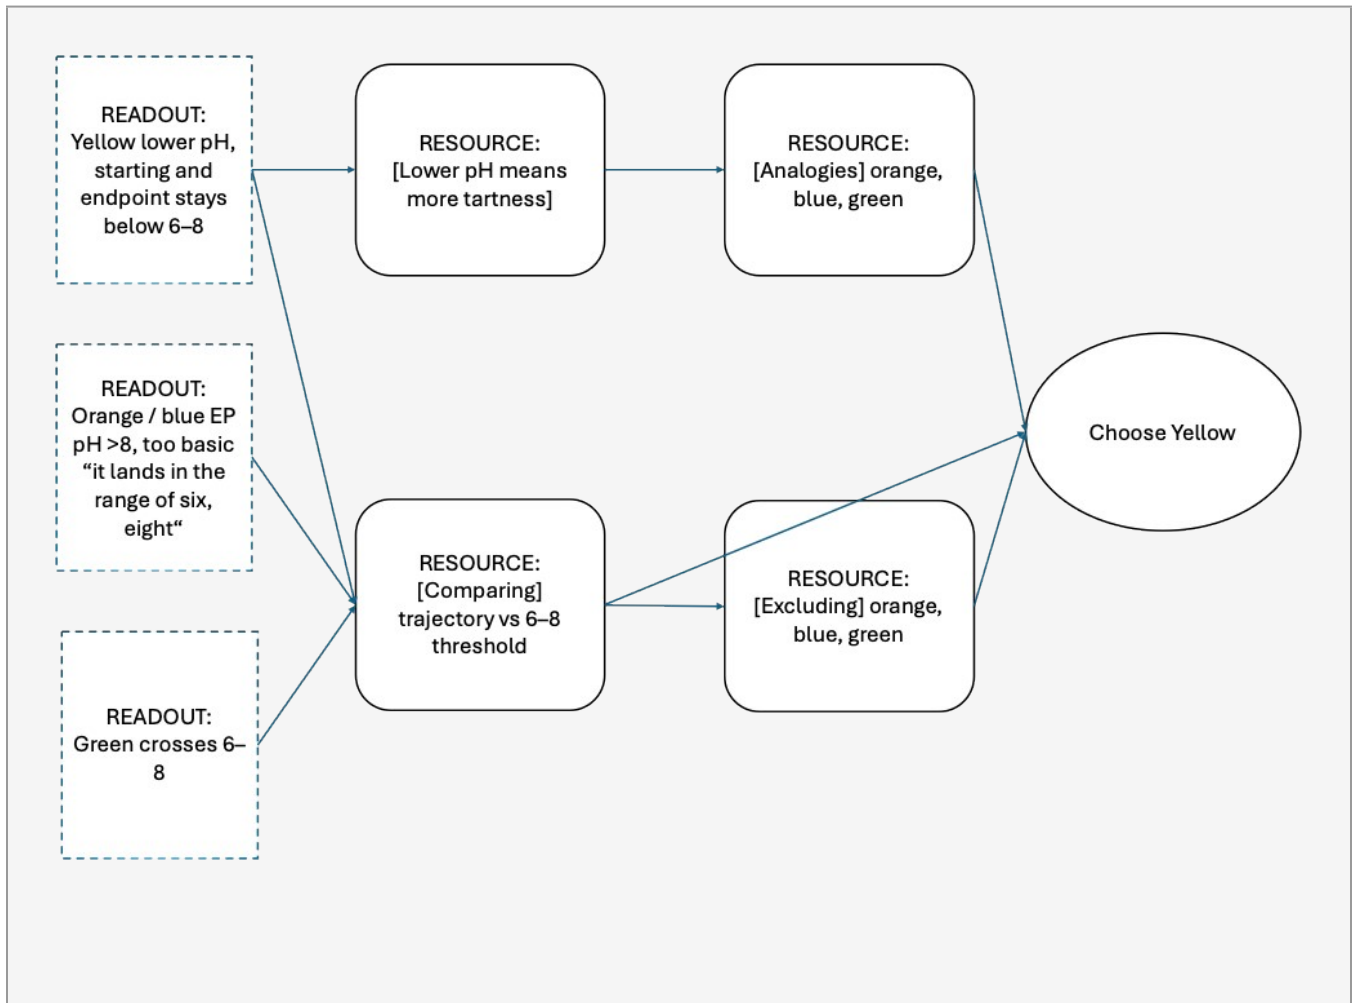

**Figure B10.** Visual representation of resource activation in the service of answering the interview question for P10, showing the readouts, activated knowledge elements, and conclusion.

## Participant P11

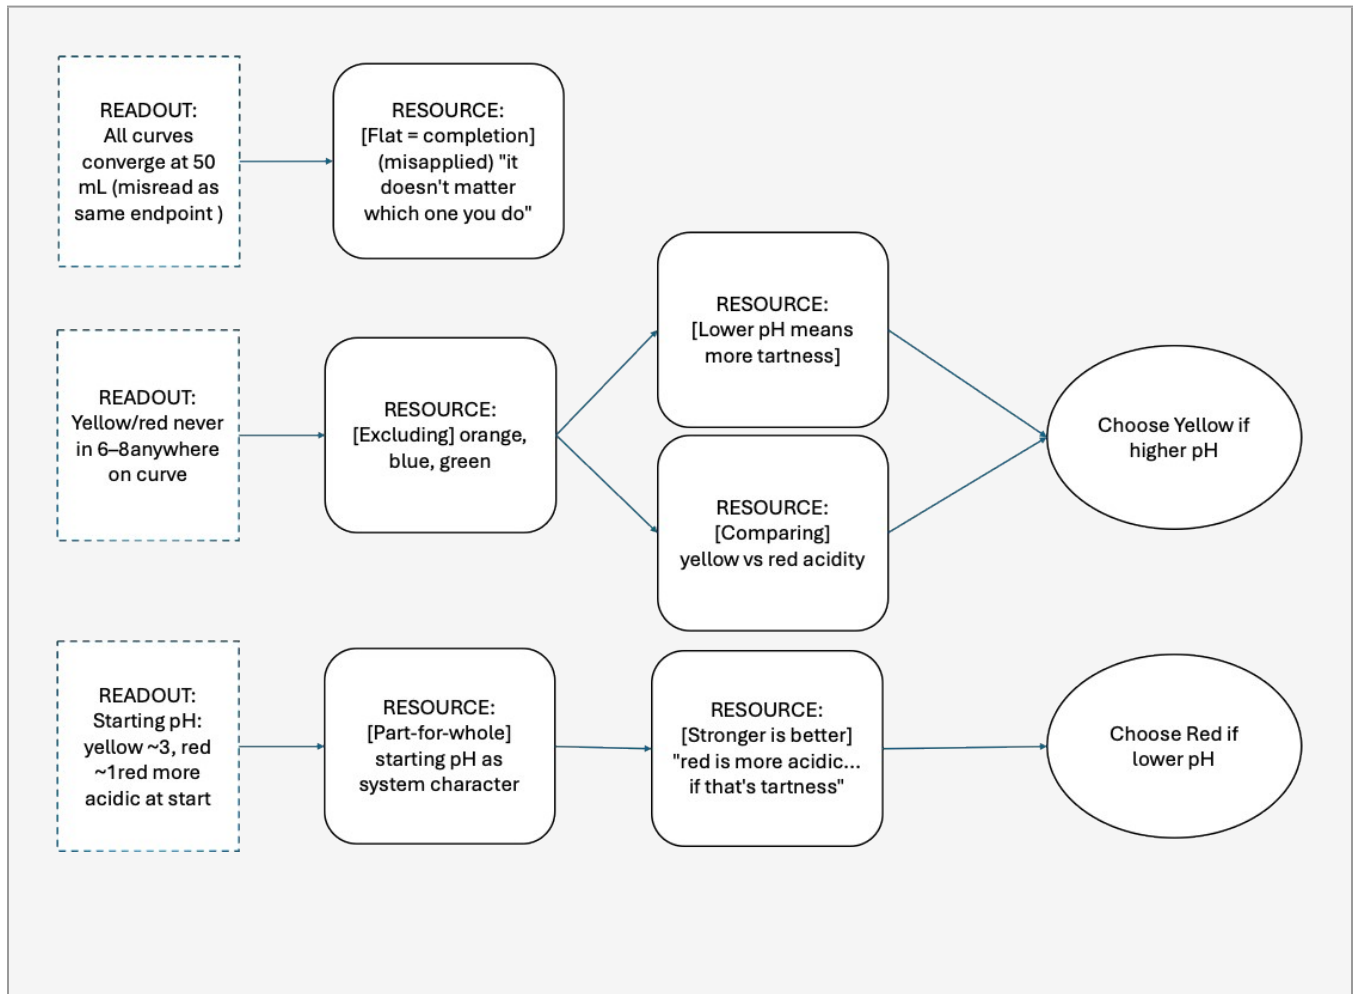

**Figure B11.** Visual representation of resource activation in the service of answering the interview question for P11, showing the readouts, activated knowledge elements, and conclusion.

## Participant P12

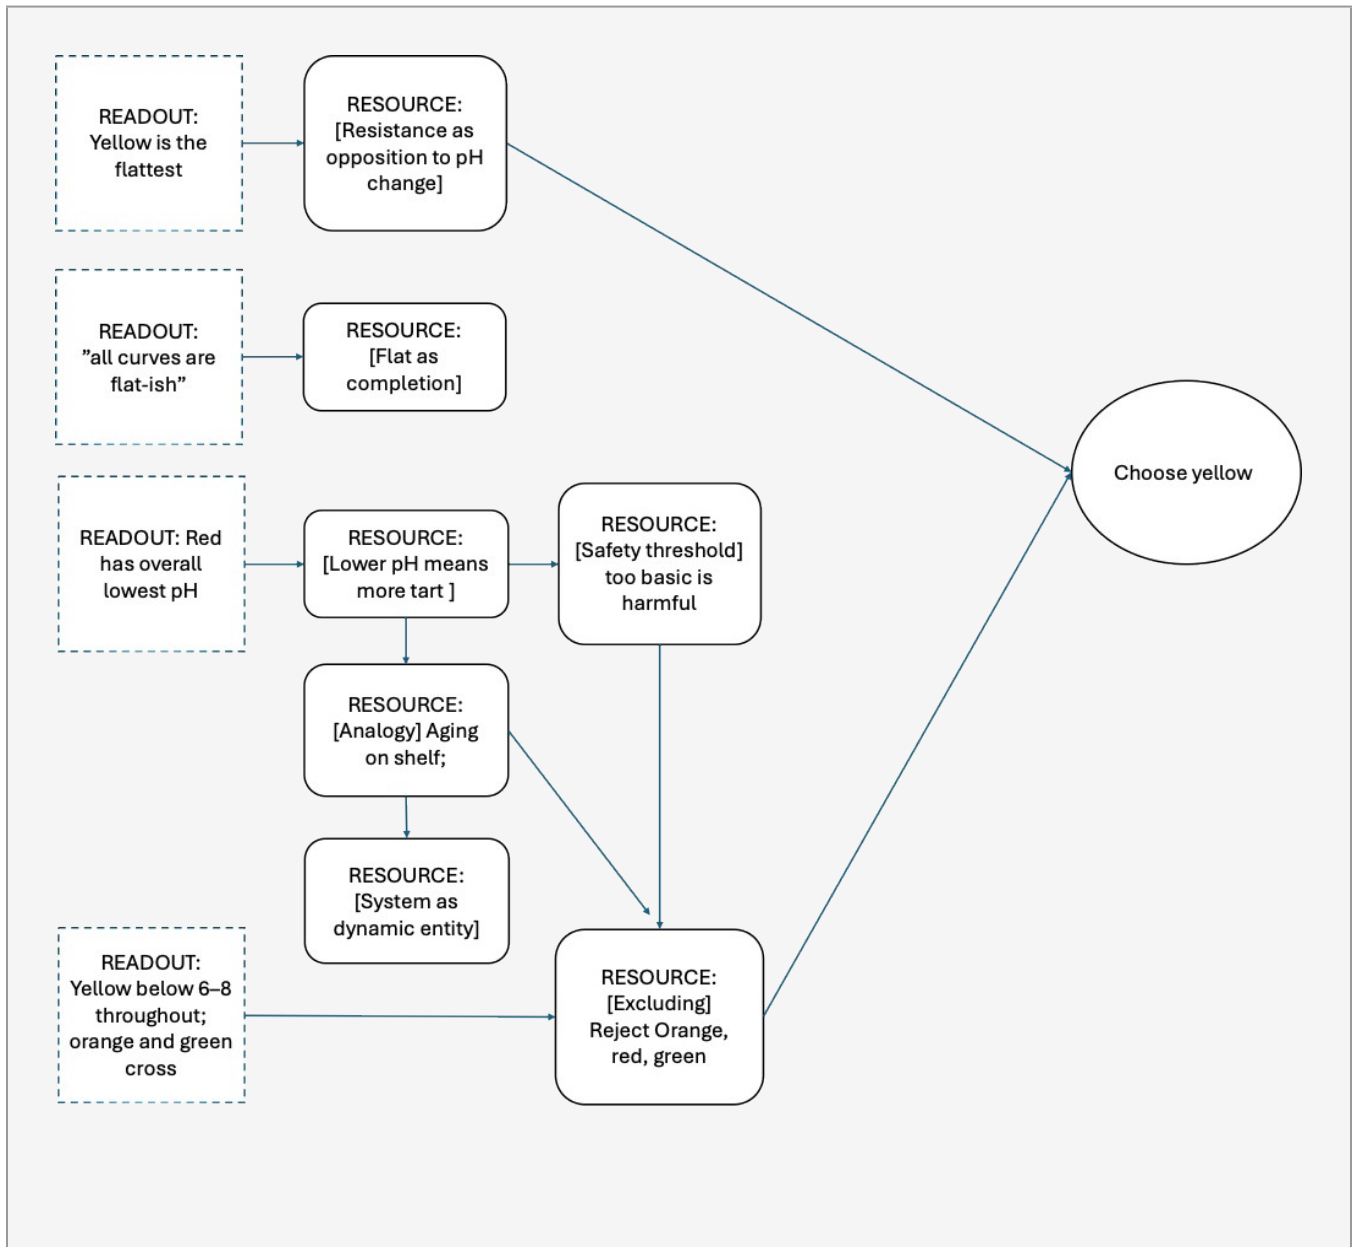

**Figure B12.** Visual representation of resource activation in the service of answering the interview question for P12, showing the readouts, activated knowledge elements, and conclusion.
